# Supplementary material for: Zoonotic Transfer of Clostridium difficile Harboring Antimicrobial Resistance between Farm Animals and Humans
Source: PubMed Central journal article supplement (PMC5824051; doi:10.1128/jcm.01384-17), 2018-02-22
Supplement: JCM.01384-17_zjm999095844s1.pdf [file JCM.01384-17_zjm999095844s1.pdf]

**Supplementary information for:**

**Zoonotic transfer of *Clostridium difficile* harboring antimicrobial resistance between farm animals and humans.**

C.W. Knetsch<sup>1,†</sup>, N. Kumar<sup>2,†</sup>, S.C. Forster<sup>2,3,4</sup>, T.R. Connor<sup>5</sup>, H.P. Browne<sup>2</sup>, C. Harmanus<sup>1</sup>, I.M. Sanders<sup>1</sup>, S.R. Harris<sup>6</sup>, L. Turner<sup>7</sup>, T. Morris<sup>7</sup>, M. Perry<sup>7</sup>, F. Miyajima<sup>8</sup>, P. Roberts<sup>8</sup>, M. Pirmohamed<sup>8</sup>, J.G. Songer<sup>9</sup>, J.S. Weese<sup>10</sup>, A. Indra<sup>11</sup>, J. Corver<sup>1</sup>, M. Rupnik<sup>12,13</sup>, B.W. Wren<sup>14</sup>, T.V. Riley<sup>15,16</sup>, E.J. Kuijper<sup>1</sup> and T.D. Lawley<sup>2,\*</sup>

\*Correspondence to: Trevor Lawley, [tl2@sanger.ac.uk](mailto:tl2@sanger.ac.uk)

†These authors contributed equally to this work

a. Permutation 1

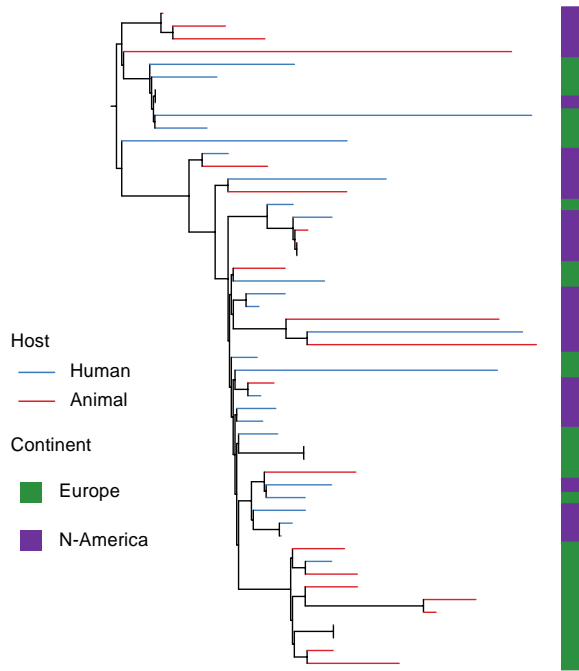

b. Permutation 2

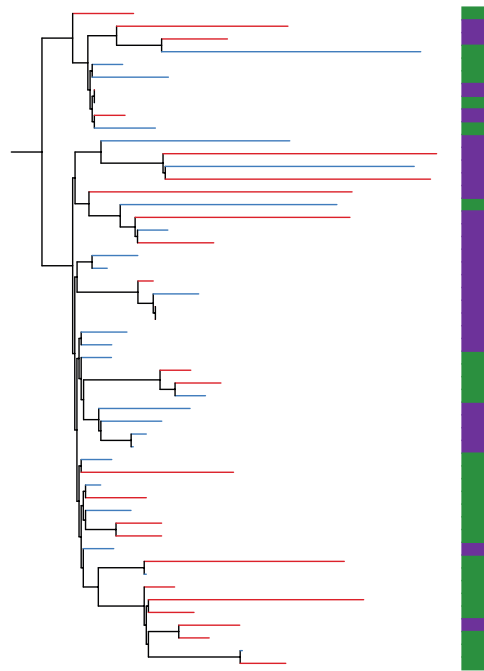

c. Permutation 3

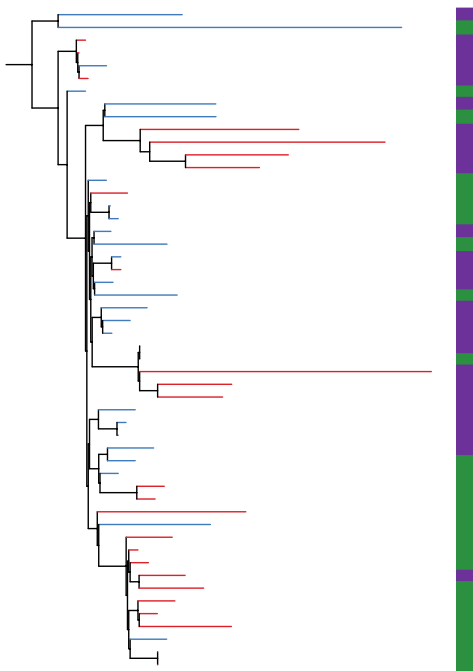

d. Permutation 4

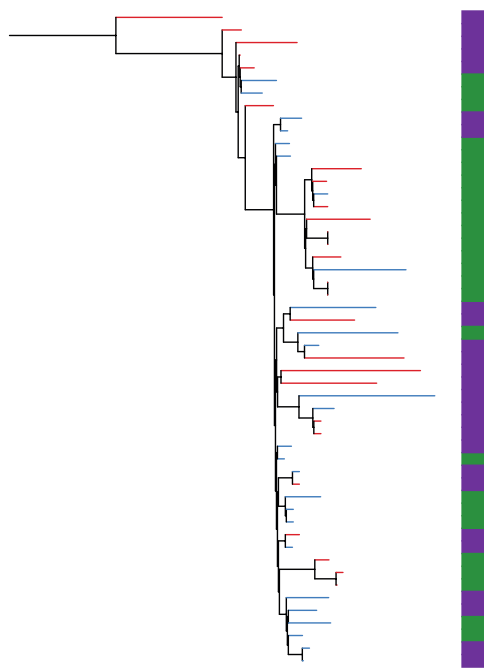

**Figure S1. Permutation analysis of *C. difficile* RT078 strains.** Four maximum likelihood phylogenies based on core genes alignment are shown. Each phylogeny includes randomly selected 52 *C. difficile* RT078 strains based on different hosts (human, 13 and animal, 13) and geographical locations (North America, 13 and Europe, 13). Strains isolated from food and environment and strains from Asia and Australia were not included due to limited number of strains. All four permuted phylogenies demonstrate similar patterns of mixing between human and animal strains as well as North American and European strains.

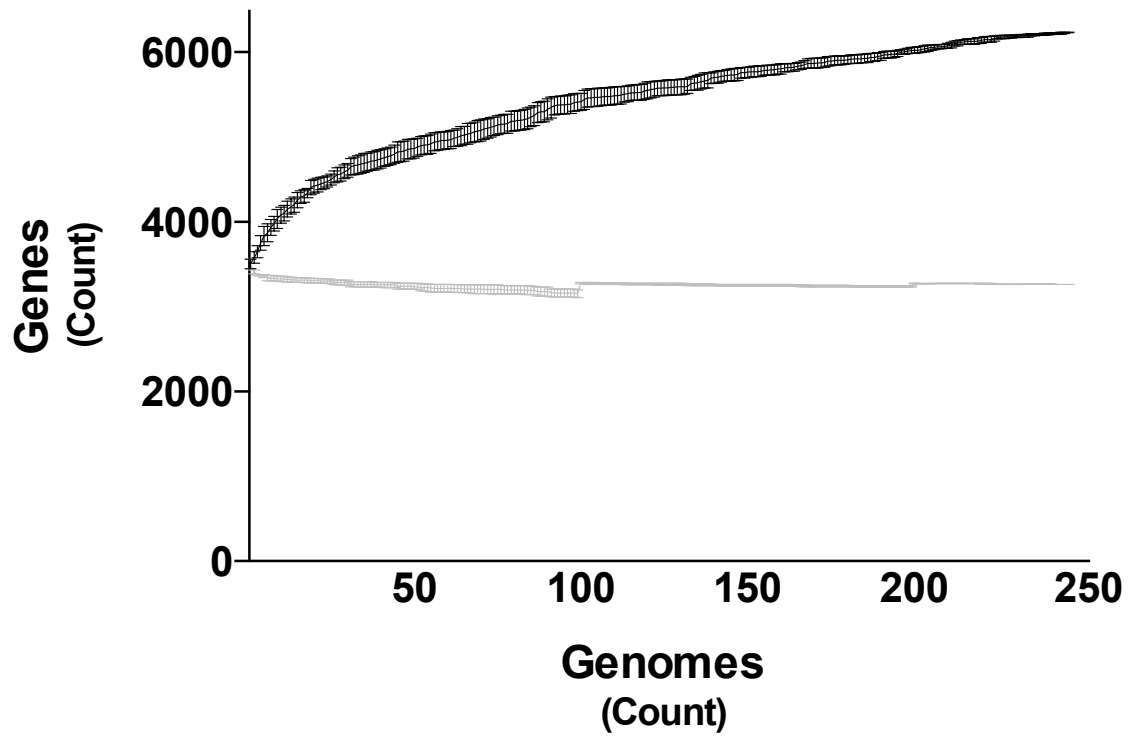

**Figure S2. Pan genome analysis.** Graph of pan genome gene content *C. difficile* RT078 strains increases (towards a total of 248 genomes; black line denotes the increasing pan genome, grey line denotes the core genome, the area between both lines is the accessory genome). The number of core genes (n=3,368) relative to the full complement of genes (pan genome; n=6,239; black) are indicated. Mean and 95% CI are plotted for randomly selected genome orders.

**Table S1.** *Clostridium difficile* RT078 isolates included in this study. ENA ids of genomes sequenced in this study are in blue and Knetsch et al; 2014 are in black.

| ENA_ID    | Continent | Country/site/study | City      | Year | Source | Source_detail | Strain   | Lab            | Amount of sequence (MB) |
|-----------|-----------|--------------------|-----------|------|--------|---------------|----------|----------------|-------------------------|
| ERS005819 | Europe    | UK                 | Belfast   | 2009 | Human  | Human         | 090692   | Belfast        | 3.890666                |
| ERS005820 | Europe    | UK                 | Belfast   | 2009 | Human  | Human         | 090374   | Belfast        | 3.867971                |
| ERS005821 | Europe    | UK                 | Belfast   | 2009 | Human  | Human         | 090323   | Belfast        | 3.871589                |
| ERS005823 | Europe    | UK                 | Belfast   | 2009 | Human  | Human         | 090099   | Belfast        | 3.873315                |
| ERS005825 | Europe    | UK                 | Belfast   | 2009 | Human  | Human         | 090571   | Belfast        | 3.877374                |
| ERS005826 | Europe    | UK                 | Belfast   | 2009 | Human  | Human         | 090574   | Belfast        | 3.858835                |
| ERS005827 | Europe    | UK                 | Belfast   | 2009 | Human  | Human         | 090608   | Belfast        | 3.883906                |
| ERS005829 | Europe    | UK                 | Belfast   | 2009 | Human  | Human         | 090372   | Belfast        | 3.871356                |
| ERS005830 | Europe    | UK                 | Belfast   | 2009 | Human  | Human         | 090668   | Belfast        | 3.868649                |
| ERS005834 | Europe    | UK                 | Belfast   | 2009 | Human  | Human         | 090652   | Belfast        | 3.865859                |
| ERS005835 | Europe    | UK                 | Belfast   | 2009 | Human  | Human         | 090482   | Belfast        | 3.863124                |
| ERS005836 | Europe    | UK                 | Belfast   | 2009 | Human  | Human         | 090600   | Belfast        | 3.915472                |
| ERS005837 | Europe    | UK                 | Belfast   | 2009 | Human  | Human         | 090021   | Belfast        | 3.869025                |
| ERS005839 | Europe    | UK                 | Belfast   | 2009 | Human  | Human         | 090445_B | Belfast        | 3.874636                |
| ERS005840 | Europe    | UK                 | Belfast   | 2009 | Human  | Human         | 090445_A | Belfast        | 3.866392                |
| ERS005842 | Europe    | UK                 | Belfast   | 2009 | Human  | Human         | 090468   | Belfast        | 3.875479                |
| ERS005847 | Europe    | UK                 | Belfast   | 2009 | Human  | Human         | 090205   | Belfast        | 3.826134                |
| ERS138003 | Australia | Australia          | Melbourne | 2007 | Human  | Human         | JIR_8535 | Leiden-Kuijper | 4.111489                |
| ERS138004 | Australia | Australia          | Perth     | 2006 | Human  | Human         | WA_94    | Leiden-Kuijper | 4.074605                |
| ERS138005 | Australia | Australia          | Perth     | 2006 | Human  | Human         | RPH_96   | Leiden-Kuijper | 3.959305                |
| ERS138006 | Australia | Australia          | Melbourne | 2007 | Human  | Human         | JIR_8522 | Leiden-Kuijper | 3.994604                |

|           |        |             |           |      |       |       |           |                |          |
|-----------|--------|-------------|-----------|------|-------|-------|-----------|----------------|----------|
| ERS138007 | Europe | Austria     | Feldkirch | 2009 | Human | Human | AT_1103   | Leiden-Kuijper | 3.982029 |
| ERS138008 | Europe | Belgium     | Louvain   | 2009 | Human | Human | BE_0104   | Leiden-Kuijper | 4.107547 |
| ERS138009 | Europe | Bulgaria    | Sofia     | 2009 | Human | Human | BG_1209   | Leiden-Kuijper | 3.962421 |
| ERS138010 | Europe | Denmark     | Odense    | 2009 | Human | Human | DK_1208   | Leiden-Kuijper | 4.005707 |
| ERS138011 | Europe | France      | Rouen     | 2009 | Human | Human | FR_0306   | Leiden-Kuijper | 3.999392 |
| ERS138012 | Europe | Germany     | Freiburg  | 2009 | Human | Human | DE_1210   | Leiden-Kuijper | 3.955792 |
| ERS138013 | Europe | Greece      | Athens    | 2009 | Human | Human | GR_0106   | Leiden-Kuijper | 3.96254  |
| ERS138014 | Europe | Hungary     | Szeged    | 2009 | Human | Human | HU_1104   | Leiden-Kuijper | 3.940605 |
| ERS138015 | Europe | Iceland     | Reykjavik | 2009 | Human | Human | IS_0102-1 | Leiden-Kuijper | 3.88913  |
| ERS138016 | Europe | Ireland     | Dublin    | 2009 | Human | Human | IE_1101   | Leiden-Kuijper | 3.943131 |
| ERS138019 | Europe | UK          | Leeds     | 2008 | Human | Human | 45/22     | Leiden-Kuijper | 3.897615 |
| ERS138020 | Europe | UK          | Leeds     | 2008 | Human | Human | R26231    | Leiden-Kuijper | 3.907054 |
| ERS138021 | Europe | Norway      | Trondheim | 2009 | Human | Human | NO_1307   | Leiden-Kuijper | 3.958264 |
| ERS138022 | Europe | Portugal    | Fonseca   | 2009 | Human | Human | PT_1203   | Leiden-Kuijper | 3.992567 |
| ERS138023 | Europe | Slovenia    | Ljubljana | 2009 | Human | Human | SI_1105   | Leiden-Kuijper | 3.906433 |
| ERS138024 | Europe | Spain       | Barcelona | 2009 | Human | Human | ES_1203   | Leiden-Kuijper | 3.907144 |
| ERS138025 | Europe | Switzerland | Basel     | 2009 | Human | Human | CH_0104   | Leiden-Kuijper | 3.970371 |
| ERS138026 | Europe | Netherlands | Leiden    | 2006 | Human | Human | 6072310   | Leiden-Kuijper | 3.89745  |
| ERS138027 | Europe | Netherlands | Nijmegen  | 2006 | Human | Human | 6086336   | Leiden-Kuijper | 4.038505 |
| ERS138028 | Europe | Netherlands | Leiden    | 2007 | Human | Human | 7001233   | Leiden-Kuijper | 4.072708 |
| ERS138029 | Europe | Netherlands | Groningen | 2007 | Human | Human | 7004578   | Leiden-Kuijper | 4.023331 |
| ERS138030 | Europe | Netherlands | Utrecht   | 2007 | Human | Human | 7005405   | Leiden-Kuijper | 3.871749 |
| ERS138031 | Europe | Netherlands | Zwolle    | 2007 | Human | Human | 7021455   | Leiden-Kuijper | 3.992912 |
| ERS138032 | Europe | Netherlands | Zwolle    | 2007 | Human | Human | 7044912   | Leiden-Kuijper | 3.876673 |
| ERS138033 | Europe | Netherlands | Zwolle    | 2007 | Human | Human | 7066827   | Leiden-Kuijper | 4.039112 |

|                           |        |             |             |      |        |       |          |                |          |
|---------------------------|--------|-------------|-------------|------|--------|-------|----------|----------------|----------|
| ERS138034                 | Europe | Netherlands | Zwolle      | 2007 | Human  | Human | 7071308  | Leiden-Kuijper | 4.064735 |
| ERS138035                 | Europe | Netherlands | Zwolle      | 2007 | Human  | Human | 7086074  | Leiden-Kuijper | 3.996044 |
| ERS138037                 | Europe | Netherlands | Leiden      | 2008 | Human  | Human | 8011061  | Leiden-Kuijper | 4.011475 |
| ERS138038                 | Europe | Netherlands | Utrecht     | 2008 | Human  | Human | 8013820  | Leiden-Kuijper | 3.959776 |
| ERS138039                 | Europe | Netherlands | Leiden      | 2008 | Human  | Human | 8051728  | Leiden-Kuijper | 3.835557 |
| ERS138040                 | Europe | Netherlands | Leiden      | 2008 | Human  | Human | 8055344  | Leiden-Kuijper | 3.938877 |
| ERS138042                 | Europe | Netherlands | Breda       | 2008 | Human  | Human | 8091554  | Leiden-Kuijper | 3.93788  |
| ERS138043                 | Europe | Netherlands | Harderwijk  | 2009 | Human  | Human | 9012668  | Leiden-Kuijper | 3.833424 |
| ERS138044                 | Europe | Netherlands | Goes        | 2009 | Human  | Human | 9019497  | Leiden-Kuijper | 3.833188 |
| ERS138045                 | Europe | Netherlands | Hoorn       | 2009 | Human  | Human | 9077637  | Leiden-Kuijper | 4.083592 |
| ERS138046                 | Europe | Netherlands | Roermond    | 2010 | Human  | Human | 10005075 | Leiden-Kuijper | 4.079046 |
| ERS138047                 | Europe | Netherlands | Rotterdam   | 2010 | Human  | Human | 10015222 | Leiden-Kuijper | 4.009925 |
| ERS138048                 | Europe | Netherlands | Velp        | 2010 | Human  | Human | 10080193 | Leiden-Kuijper | 4.065455 |
| ERS138049                 | Europe | Netherlands | Zeeland     | 2011 | Human  | Human | 11012929 | Leiden-Kuijper | 4.09807  |
| ERS138051                 | Europe | Netherlands | Zwolle      | 2009 | Human  | Human | NL_1103  | Leiden-Kuijper | 4.082329 |
| ERS138052                 | Europe | Netherlands | Gastel      | 2009 | Animal | Swine | P29      | Leiden-Kuijper | 4.120959 |
| ERS138053                 | Europe | Netherlands | NI          | 2009 | Animal | Swine | P60      | Leiden-Kuijper | 3.964137 |
| ERS138054                 | Europe | Netherlands | Flevoland   | 2009 | Animal | Swine | P27      | Leiden-Kuijper | 3.947963 |
| ERS138055                 | Europe | Netherlands | NI          | 2009 | Animal | Swine | P70      | Leiden-Kuijper | 4.050756 |
| ERS138056                 | Europe | Netherlands | Tolakker    | 2009 | Animal | Swine | P52      | Leiden-Kuijper | 3.936637 |
| <a href="#">ERS138057</a> | Europe | UK          | Glasgow     | 2009 | Human  | Human | UK_1302  | Leiden-Kuijper | 3.939525 |
| ERS138063                 | Europe | Netherlands | Netherlands | 2002 | Human  | Human | 126065   | Leiden-Kuijper | 3.990764 |
| ERS138064                 | Europe | Netherlands | Netherlands | 2002 | Human  | Human | 126819   | Leiden-Kuijper | 3.941533 |
| ERS138065                 | Europe | Netherlands | Netherlands | 2002 | Human  | Human | 126938   | Leiden-Kuijper | 3.940558 |
| ERS138066                 | Europe | Netherlands | Netherlands | 2002 | Human  | Human | 129820   | Leiden-Kuijper | 3.865841 |

|                           |           |                         |              |      |        |        |        |                |          |
|---------------------------|-----------|-------------------------|--------------|------|--------|--------|--------|----------------|----------|
| <a href="#">ERS138067</a> | Europe    | Netherlands             | Netherlands  | 2010 | Animal | horse  | cvi52  | Leiden-Kuijper | 4.082987 |
| <a href="#">ERS138068</a> | Europe    | Netherlands             | Netherlands  | 2010 | Animal | horse  | cvi53  | Leiden-Kuijper | 4.08574  |
| <a href="#">ERS138069</a> | Europe    | Netherlands             | Aarle-Rixtel | 2011 | human  | human  | H205   | Leiden-Kuijper | 3.869255 |
| <a href="#">ERS138070</a> | Europe    | Netherlands             | Aarle-Rixtel | 2011 | Animal | Swine  | B37.2  | Leiden-Kuijper | 3.866941 |
| <a href="#">ERS138073</a> | Europe    | Netherlands             | Netherlands  | 2010 | Human  | Human  | 53737  | Leiden-Kuijper | 3.950177 |
| <a href="#">ERS138074</a> | Europe    | Netherlands             | Netherlands  | 2007 | Human  | Human  | 47337  | Leiden-Kuijper | 3.894323 |
| <a href="#">ERS138087</a> | N-America | Ontario_Hospital_MS     | NI           | 2005 | Human  | Human  | MOH649 | Guelph-Weese   | 4.042571 |
| <a href="#">ERS138088</a> | N-America | Ontario_Hospital-k      | NI           | 2005 | Human  | Human  | MOH673 | Guelph-Weese   | 3.876956 |
| <a href="#">ERS138089</a> | N-America | Ontario_Hospital-HDGH   | NI           | 2005 | Human  | Human  | MOH887 | Guelph-Weese   | 4.002402 |
| <a href="#">ERS138090</a> | N-America | Ontario_Hospital-MS     | NI           | 2005 | Human  | Human  | M0H744 | Guelph-Weese   | 4.047394 |
| <a href="#">ERS138092</a> | Asia      | Iran                    | NI           | 2011 | Human  | Human  | MJ20   | Guelph-Weese   | 3.941343 |
| <a href="#">ERS138093</a> | Asia      | Iran                    | NI           | 2011 | Human  | Human  | MJ38   | Guelph-Weese   | 4.042855 |
| <a href="#">ERS138094</a> | Asia      | Iran                    | NI           | 2011 | Human  | Human  | MJ39   | Guelph-Weese   | 3.981697 |
| <a href="#">ERS138095</a> | N-America | Ontario_Hospital_MS     | NI           | 2004 | Human  | Human  | Cd247  | Guelph-Weese   | 3.83856  |
| <a href="#">ERS138096</a> | N-America | Ontario_Hospital_MS     | NI           | 2004 | Human  | Human  | Cd357  | Guelph-Weese   | 3.9295   |
| <a href="#">ERS138097</a> | N-America | Ontario_Hospital_JB     | NI           | 2008 | Human  | Human  | Cd901  | Guelph-Weese   | 3.914076 |
| <a href="#">ERS138098</a> | N-America | Ontario_Hospital_B      | NI           | 2008 | Human  | Human  | Cd973  | Guelph-Weese   | 3.873811 |
| <a href="#">ERS138099</a> | N-America | Ontario_Hospital_K      | NI           | 2011 | Human  | Human  | MF958  | Guelph-Weese   | 3.918145 |
| <a href="#">ERS138100</a> | N-America | Ontario_Hospital_CH     | NI           | 2011 | Human  | Human  | CHP20  | Guelph-Weese   | 3.841065 |
| <a href="#">ERS138103</a> | N-America | Manitoba                | NI           | 2008 | Animal | Swine  | Cd1082 | Guelph-Weese   | 3.963425 |
| <a href="#">ERS138104</a> | N-America | Ontario                 | NI           | 2008 | Animal | Swine  | Cd1085 | Guelph-Weese   | 3.963828 |
| <a href="#">ERS138105</a> | N-America | Saskatchewan            | NI           | 2009 | Animal | Swine  | Cd1087 | Guelph-Weese   | 3.967526 |
| <a href="#">ERS138107</a> | N-America | Ontario                 | NI           | 2009 | Animal | Swine  | Cd1095 | Guelph-Weese   | 3.964246 |
| <a href="#">ERS138115</a> | N-America | Case-control_study_2004 | NI           | 2004 | Animal | Bovine | Cd729  | Guelph-Weese   | 4.002431 |
| <a href="#">ERS138116</a> | N-America | Case-control_study_2004 | NI           | 2004 | Animal | Bovine | Cd732  | Guelph-Weese   | 3.980178 |



|           |           |                         |           |      |        |               |           |                       |          |
|-----------|-----------|-------------------------|-----------|------|--------|---------------|-----------|-----------------------|----------|
| ERS138117 | N-America | Case-control_study_2004 | NI        | 2004 | Animal | Bovine        | Cd739     | Guelph-Weese          | 3.846505 |
| ERS138118 | N-America | Case-control_study_2004 | NI        | 2004 | Animal | Bovine        | Cd745     | Guelph-Weese          | 3.908312 |
| ERS138119 | N-America | Case-control_study_2004 | NI        | 2004 | Animal | Bovine        | Cd757     | Guelph-Weese          | 3.920078 |
| ERS138120 | N-America | Ontario                 | NI        | 2010 | Animal | Equine        | AS-Ie     | Guelph-Weese          | 3.845395 |
| ERS138122 | N-America | Ontario                 | NI        | 2010 | Animal | Equine        | AS-VI-2   | Guelph-Weese          | 3.905424 |
| ERS138124 | N-America | Ontario                 | NI        | 2008 | Food   | Chicken_thigh | Cd1014    | Guelph-Weese          | 3.840168 |
| ERS138125 | N-America | Ontario                 | NI        | 2008 | Food   | Chicken_leg   | Cd1035    | Guelph-Weese          | 3.956672 |
| ERS138126 | N-America | Ontario                 | NI        | 2008 | Food   | Chicken_wing  | Cd1037    | Guelph-Weese          | 3.957376 |
| ERS138127 | N-America | Ontario                 | NI        | 2008 | Food   | Chicken_thigh | Cd1069    | Guelph-Weese          | 3.834714 |
| ERS138130 | Europe    | UK                      | Liverpool | 2009 | Human  | Human         | CDP080037 | Liverpool-F. Miyajima | 3.95866  |
| ERS138132 | Europe    | UK                      | Liverpool | 2009 | Human  | Human         | CDN080535 | Liverpool-F. Miyajima | 3.961183 |
| ERS138133 | Europe    | UK                      | Liverpool | 2009 | Human  | Human         | 43236_X   | Liverpool-F. Miyajima | 3.911063 |
| ERS138134 | Europe    | UK                      | Liverpool | 2009 | Human  | Human         | 25047_J   | Liverpool-F. Miyajima | 4.029163 |
| ERS138135 | Europe    | UK                      | Liverpool | 2009 | Human  | Human         | CDP080060 | Liverpool-F. Miyajima | 4.086043 |
| ERS138136 | Europe    | UK                      | Liverpool | 2009 | Human  | Human         | CDN080571 | Liverpool-F. Miyajima | 3.978151 |
| ERS138137 | Europe    | UK                      | Liverpool | 2009 | Human  | Human         | CDN080575 | Liverpool-F. Miyajima | 3.956806 |
| ERS138138 | Europe    | UK                      | Liverpool | 2010 | Human  | Human         | CDN080576 | Liverpool-F. Miyajima | 3.871238 |
| ERS138139 | Europe    | UK                      | Liverpool | 2010 | Human  | Human         | CDN080581 | Liverpool-F. Miyajima | 3.9568   |
| ERS138140 | Europe    | UK                      | Liverpool | 2010 | Human  | Human         | CDN080584 | Liverpool-F. Miyajima | 3.994223 |
| ERS138141 | Europe    | UK                      | Liverpool | 2010 | Human  | Human         | CDN080585 | Liverpool-F. Miyajima | 3.8681   |
| ERS138142 | Europe    | UK                      | Liverpool | 2010 | Human  | Human         | CDP080084 | Liverpool-F. Miyajima | 3.87666  |
| ERS138143 | Europe    | UK                      | Liverpool | 2010 | Human  | Human         | CDN080590 | Liverpool-F. Miyajima | 3.961571 |
| ERS138144 | Europe    | UK                      | Liverpool | 2010 | Human  | Human         | CDP080088 | Liverpool-F. Miyajima | 3.851189 |
| ERS138145 | Europe    | UK                      | Liverpool | 2010 | Human  | Human         | CDP080097 | Liverpool-F. Miyajima | 3.90988  |
| ERS138146 | Europe    | UK                      | Liverpool | 2010 | Human  | Human         | CDN080599 | Liverpool-F. Miyajima | 3.907774 |

|            |           |      |           |      |        |        |           |                       |          |
|------------|-----------|------|-----------|------|--------|--------|-----------|-----------------------|----------|
| ERS138147  | Europe    | UK   | Liverpool | 2010 | Human  | Human  | CDP080102 | Liverpool-F. Miyajima | 3.963185 |
| ERS138148  | Europe    | UK   | Liverpool | 2010 | Human  | Human  | CDP080108 | Liverpool-F. Miyajima | 3.958722 |
| ERS138149  | Europe    | UK   | Liverpool | 2010 | Human  | Human  | CDP080109 | Liverpool-F. Miyajima | 3.889673 |
| ERS138151  | Europe    | UK   | Liverpool | 2011 | Human  | Human  | 13928.H   | Liverpool-F. Miyajima | 3.938534 |
| ERS138152  | Europe    | UK   | Liverpool | 2011 | Human  | Human  | 16182.P   | Liverpool-F. Miyajima | 3.960883 |
| ERS138154  | Europe    | UK   | Liverpool | 2011 | Human  | Human  | 52357.D   | Liverpool-F. Miyajima | 4.031947 |
| ERS1645161 | Europe    | UK   | Cardiff   | 1996 | Human  | Human  |           | Cardiff- T. Connor    | 3.975253 |
| ERS1645162 | Europe    | UK   | Cardiff   | 1996 | Human  | Human  |           | Cardiff- T. Connor    | 4.100392 |
| ERS1645163 | Europe    | UK   | Cardiff   | 1997 | Human  | Human  |           | Cardiff- T. Connor    | 3.966632 |
| ERS1645164 | Europe    | UK   | Cardiff   | 1997 | Human  | Human  |           | Cardiff- T. Connor    | 4.105619 |
| ERS1645165 | Europe    | UK   | Cardiff   | 1997 | Human  | Human  |           | Cardiff- T. Connor    | 3.966245 |
| ERS1645166 | Europe    | UK   | Cardiff   | 1997 | Human  | Human  |           | Cardiff- T. Connor    | 3.930095 |
| ERS1645167 | Europe    | UK   | Cardiff   | 1998 | Human  | Human  |           | Cardiff- T. Connor    | 4.019092 |
| ERS1645168 | Europe    | UK   | Cardiff   | 1994 | Human  | Human  |           | Cardiff- T. Connor    | 3.928639 |
| ERS188478  | N-America | Iowa | NI        | 1999 | Animal | Swine  | 382       | Iowa-Songer           | 3.891978 |
| ERS188479  | N-America | Iowa | NI        | 2000 | Animal | Swine  | 449       | Iowa-Songer           | 3.907055 |
| ERS188480  | N-America | Iowa | NI        | 2001 | Animal | Swine  | 645       | Iowa-Songer           | 3.851929 |
| ERS188481  | N-America | Iowa | NI        | 2001 | Animal | Swine  | 649       | Iowa-Songer           | 3.899151 |
| ERS188482  | N-America | Iowa | NI        | 2002 | Animal | Swine  | 652       | Iowa-Songer           | 3.945244 |
| ERS188483  | N-America | Iowa | NI        | 2002 | Animal | Swine  | 685       | Iowa-Songer           | 3.988367 |
| ERS188484  | N-America | Iowa | NI        | 2002 | Animal | Swine  | 696       | Iowa-Songer           | 3.928586 |
| ERS188485  | N-America | Iowa | NI        | 2006 | Animal | Bovine | 697       | Iowa-Songer           | 3.968063 |
| ERS188486  | N-America | Iowa | NI        | 2006 | Animal | Bovine | 701       | Iowa-Songer           | 3.893246 |
| ERS188487  | N-America | Iowa | NI        | 2006 | Animal | Bovine | 706       | Iowa-Songer           | 3.993404 |
| ERS188489  | N-America | Iowa | NI        | 2002 | Animal | Swine  | 734       | Iowa-Songer           | 3.942151 |

|           |           |           |                 |      |        |        |        |              |          |
|-----------|-----------|-----------|-----------------|------|--------|--------|--------|--------------|----------|
| ERS188492 | N-America | Iowa      | NI              | 2002 | Animal | Swine  | 778    | Iowa-Songer  | 3.846361 |
| ERS188493 | N-America | Iowa      | NI              | 2002 | Animal | Bovine | 796    | Iowa-Songer  | 3.975672 |
| ERS188494 | N-America | Iowa      | NI              | 2002 | Animal | Swine  | 801    | Iowa-Songer  | 3.993712 |
| ERS188495 | N-America | Iowa      | NI              | 2002 | Animal | Bovine | 817    | Iowa-Songer  | 3.954906 |
| ERS188498 | N-America | Iowa      | NI              | 2002 | Animal | Bovine | 854    | Iowa-Songer  | 3.969691 |
| ERS188502 | N-America | Iowa      | NI              | 2006 | Human  | Human  | 6180   | Iowa-Songer  | 3.991632 |
| ERS188503 | N-America | Iowa      | NI              | 2006 | Human  | Human  | 6181   | Iowa-Songer  | 3.851683 |
| ERS188504 | N-America | Iowa      | NI              | 2006 | Human  | Human  | 6182   | Iowa-Songer  | 3.850761 |
| ERS188534 | Australia | Australia | Sydney          | 2011 | Human  | Human  | ES_471 | Monash-Riley | 3.961765 |
| ERS188555 | Europe    | UK        | Dudley          | 2007 | Human  | Human  | 078.1  | Birmingham   | 3.950124 |
| ERS188556 | Europe    | UK        | Staffordshire   | 2007 | Human  | Human  | 078.2  | Birmingham   | 3.891632 |
| ERS188557 | Europe    | UK        | Dudley          | 2008 | Human  | Human  | 078.3  | Birmingham   | 3.933567 |
| ERS188558 | Europe    | UK        | Birmingham      | 2008 | Human  | Human  | 078.4  | Birmingham   | 3.885592 |
| ERS188559 | Europe    | UK        | Coventry        | 2008 | Human  | Human  | 078.5  | Birmingham   | 3.937331 |
| ERS188560 | Europe    | UK        | Lincolnshire    | 2008 | Human  | Human  | 078.6  | Birmingham   | 3.821256 |
| ERS188561 | Europe    | UK        | Shrewsbury      | 2008 | Human  | Human  | 078.7  | Birmingham   | 4.00415  |
| ERS188562 | Europe    | UK        | Nottinghamshire | 2008 | Human  | Human  | 078.8  | Birmingham   | 3.825363 |
| ERS188563 | Europe    | UK        | Derbyshire      | 2009 | Human  | Human  | 078.9  | Birmingham   | 3.935596 |
| ERS188564 | Europe    | UK        | Worcestershire  | 2009 | Human  | Human  | 078.10 | Birmingham   | 3.887548 |
| ERS188565 | Europe    | UK        | Walsall         | 2009 | Human  | Human  | 078.11 | Birmingham   | 3.8495   |
| ERS188566 | Europe    | UK        | Nottinghamshire | 2009 | Human  | Human  | 078.12 | Birmingham   | 3.931376 |
| ERS188567 | Europe    | UK        | Worcestershire  | 2010 | Human  | Human  | 078.13 | Birmingham   | 3.823766 |
| ERS188569 | Europe    | UK        | Shrewsbury      | 2010 | Human  | Human  | 078.15 | Birmingham   | 3.889828 |
| ERS188570 | Europe    | UK        | Shrewsbury      | 2010 | Human  | Human  | 078.16 | Birmingham   | 3.941903 |
| ERS188571 | Europe    | UK        | Shrewsbury      | 2010 | Human  | Human  | 078.17 | Birmingham   | 3.93559  |

|           |        |         |                 |      |       |       |          |            |          |
|-----------|--------|---------|-----------------|------|-------|-------|----------|------------|----------|
| ERS188572 | Europe | UK      | Shrewsbury      | 2010 | Human | Human | 078.18   | Birmingham | 3.840718 |
| ERS188573 | Europe | UK      | Northants       | 2010 | Human | Human | 078.19   | Birmingham | 3.916189 |
| ERS188574 | Europe | UK      | Nottinghamshire | 2010 | Human | Human | 078.20   | Birmingham | 3.896075 |
| ERS188575 | Europe | UK      | Northants       | 2010 | Human | Human | 078.21   | Birmingham | 4.036098 |
| ERS188576 | Europe | UK      | Northants       | 2011 | Human | Human | 078.22   | Birmingham | 3.866922 |
| ERS188577 | Europe | UK      | Shrewsbury      | 2011 | Human | Human | 078.23   | Birmingham | 3.840113 |
| ERS188578 | Europe | UK      | Shrewsbury      | 2011 | Human | Human | 078.24   | Birmingham | 3.962682 |
| ERS188579 | Europe | UK      | Shrewsbury      | 2011 | Human | Human | 078.25   | Birmingham | 3.962219 |
| ERS188580 | Europe | UK      | Staffordshire   | 2011 | Human | Human | 078.26   | Birmingham | 4.008034 |
| ERS188581 | Europe | UK      | Northants       | 2011 | Human | Human | 078.27   | Birmingham | 3.870671 |
| ERS188582 | Europe | UK      | Walsall         | 2011 | Human | Human | 078.28   | Birmingham | 3.848588 |
| ERS188583 | Europe | UK      | Shrewsbury      | 2011 | Human | Human | 078.29   | Birmingham | 3.963406 |
| ERS188584 | Europe | UK      | Lincolnshire    | 2011 | Human | Human | 078.30   | Birmingham | 3.962778 |
| ERS188585 | Europe | UK      | Birmingham      | 2011 | Human | Human | 078.31   | Birmingham | 3.919167 |
| ERS188586 | Europe | UK      | Shrewsbury      | 2009 | Human | Human | 078.32   | Birmingham | 3.964696 |
| ERS188587 | Europe | UK      | Dudley          | 2011 | Human | Human | 078.33   | Birmingham | 3.903676 |
| ERS188588 | Europe | UK      | Dudley          | 2011 | Human | Human | 078.34   | Birmingham | 3.97005  |
| ERS188589 | Europe | UK      | Derbyshire      | 2011 | Human | Human | 078.35   | Birmingham | 3.907765 |
| ERS188590 | Europe | UK      | Nottinghamshire | 2011 | Human | Human | 078.36   | Birmingham | 3.835469 |
| ERS188591 | Europe | UK      | Shrewsbury      | 2012 | Human | Human | 078.37   | Birmingham | 3.958636 |
| ERS188592 | Europe | UK      | Coventry        | 2012 | Human | Human | 078.38   | Birmingham | 4.049715 |
| ERS188658 | Europe | Glasgow | EDI-CML         | 2008 | Human | Human | 20080322 | Glasgow    | 3.94181  |
| ERS188659 | Europe | Glasgow | GLA-ROY         | 2008 | Human | Human | 20080936 | Glasgow    | 3.961665 |
| ERS188660 | Europe | Glasgow | ABD-ROY         | 2010 | Human | Human | 20100862 | Glasgow    | 4.021448 |
| ERS188661 | Europe | Glasgow | EDI-ROY         | 2012 | Human | Human | 20120077 | Glasgow    | 3.869846 |

|           |        |             |               |      |             |             |             |                     |          |
|-----------|--------|-------------|---------------|------|-------------|-------------|-------------|---------------------|----------|
| ERS188662 | Europe | Glasgow     | EDI-ROY       | 2012 | Human       | Human       | 20120080    | Glasgow             | 3.867824 |
| ERS188663 | Europe | Glasgow     | GLA-ROY       | 2012 | Human       | Human       | 20120423    | Glasgow             | 4.11007  |
| ERS188664 | Europe | Glasgow     | INV-RAI       | 2012 | Human       | Human       | 20120540    | Glasgow             | 3.963186 |
| ERS188665 | Europe | Glasgow     | EDI-ROY       | 2012 | Human       | Human       | 20120569    | Glasgow             | 3.864738 |
| ERS188666 | Europe | Glasgow     | EDI-ROY       | 2012 | Human       | Human       | 20120812    | Glasgow             | 3.867326 |
| ERS188667 | Europe | Glasgow     | AYR-ARL       | 2012 | Human       | Human       | 20120873    | Glasgow             | 3.866129 |
| ERS199743 | Europe | Austria     | NI            | 2010 | Animal      | Calf        | 910150/2010 | Austria-Indra       | 3.901198 |
| ERS199744 | Europe | Austria     | NI            | 2012 | Animal      | Swine       | 910500/2012 | Austria-Indra       | 4.041694 |
| ERS199746 | Europe | Austria     | NI            | 2012 | Animal      | Swine       | 910503/2012 | Austria-Indra       | 4.039241 |
| ERS199747 | Europe | Austria     | Vienna        | 2012 | human       | human       | 910511/2012 | Austria-Indra       | 4.085182 |
| ERS199748 | Europe | Austria     | Tyrol         | 2012 | human       | human       | 910528/2012 | Austria-Indra       | 4.015643 |
| ERS199749 | Europe | Austria     | Styria        | 2012 | human       | human       | 910551/2012 | Austria-Indra       | 4.008419 |
| ERS199750 | Europe | Belgium     | NI            | 2010 | Animal      | Calf        | S4          | Slovenia- M. Rupnik | 4.054965 |
| ERS199751 | Europe | Belgium     | NI            | 2010 | Animal      | Calf        | S8          | Slovenia- M. Rupnik | 4.05101  |
| ERS199753 | Europe | Belgium     | NI            | 2010 | Animal      | Calf        | S12         | Slovenia- M. Rupnik | 3.88543  |
| ERS199755 | Europe | Belgium     | NI            | 2010 | Animal      | Calf        | S16         | Slovenia- M. Rupnik | 3.882253 |
| ERS199756 | Europe | Belgium     | NI            | 2010 | Animal      | Calf        | S17         | Slovenia- M. Rupnik | 4.057932 |
| ERS199759 | Europe | Belgium     | NI            | 2010 | Animal      | Calf        | S23         | Slovenia- M. Rupnik | 4.052452 |
| ERS199762 | Europe | Belgium     | NI            | 2010 | Animal      | Calf        | S27         | Slovenia- M. Rupnik | 4.121371 |
| ERS199765 | Europe | Slovenia    | NI            | 2009 | Environment | River_water | ZZV09-2266  | Slovenia- M. Rupnik | 3.924512 |
| ERS199786 | Europe | Netherlands | Lemele        | 2011 | Human       | farmer      | H102        | Leiden-Kuijper      | 3.97726  |
| ERS199787 | Europe | Netherlands | Raamsdonkveer | 2011 | Animal      | Swine       | B31.3       | Leiden-Kuijper      | 4.034344 |
| ERS199788 | Europe | Netherlands | Heino         | 2011 | Animal      | Swine       | B17.3       | Leiden-Kuijper      | 3.947923 |
| ERS199789 | Europe | Netherlands | Ulft          | 2011 | Human       | farmer      | H121        | Leiden-Kuijper      | 3.965174 |
| ERS199790 | Europe | Netherlands | Rijen         | 2011 | Animal      | Swine       | B27.7       | Leiden-Kuijper      | 4.067124 |

|                           |        |             |               |      |        |        |         |                |          |
|---------------------------|--------|-------------|---------------|------|--------|--------|---------|----------------|----------|
| ERS199791                 | Europe | Netherlands | Baarle-Nassau | 2011 | Human  | farmer | H230    | Leiden-Kuijper | 4.046339 |
| ERS199792                 | Europe | Netherlands | Oirschot      | 2011 | Human  | farmer | H189    | Leiden-Kuijper | 4.068827 |
| ERS199793                 | Europe | Netherlands | Lierop        | 2011 | Animal | Swine  | B23.6   | Leiden-Kuijper | 4.088705 |
| ERS199794                 | Europe | Netherlands | Aarle-Rixtel  | 2011 | Human  | farmer | H205    | Leiden-Kuijper | 3.885643 |
| ERS199795                 | Europe | Netherlands | Hardenberg    | 2011 | Animal | Swine  | B15.1   | Leiden-Kuijper | 3.992438 |
| ERS199796                 | Europe | Netherlands | NI            | 2011 | Human  | farmer | H21     | Leiden-Kuijper | 4.021918 |
| ERS199797                 | Europe | Netherlands | Oirschot      | 2011 | Animal | Swine  | B30.5   | Leiden-Kuijper | 3.950647 |
| ERS199798                 | Europe | Netherlands | Rijen         | 2011 | Human  | farmer | H122    | Leiden-Kuijper | 3.876074 |
| ERS199799                 | Europe | Netherlands | Hardenberg    | 2011 | Human  | farmer | H95     | Leiden-Kuijper | 3.982881 |
| ERS199800                 | Europe | Netherlands | Raamsdonk     | 2011 | Animal | Swine  | B28.1   | Leiden-Kuijper | 4.134619 |
| ERS199801                 | Europe | Netherlands | NI            | 2011 | Human  | farmer | H214    | Leiden-Kuijper | 3.87767  |
| ERS199802                 | Europe | Netherlands | NI            | 2011 | Human  | farmer | H258    | Leiden-Kuijper | 4.032468 |
| ERS199803                 | Europe | Netherlands | Heino         | 2011 | Human  | farmer | H88     | Leiden-Kuijper | 3.949852 |
| ERS199804                 | Europe | Netherlands | NI            | 2011 | Human  | farmer | H111    | Leiden-Kuijper | 4.002207 |
| ERS199805                 | Europe | Netherlands | Baarle-Nassau | 2011 | Animal | Swine  | B39.4   | Leiden-Kuijper | 4.056245 |
| ERS199806                 | Europe | Netherlands | Moergestel    | 2011 | Animal | Swine  | B4.2    | Leiden-Kuijper | 3.907108 |
| ERS199807                 | Europe | Netherlands | Lemele        | 2011 | Animal | Swine  | B20.1   | Leiden-Kuijper | 3.948195 |
| ERS199809                 | Europe | Netherlands | Aarle-Rixtel  | 2011 | Animal | Swine  | B37.3   | Leiden-Kuijper | 3.886593 |
| ERS199810                 | Europe | Netherlands | Ermelo        | 2011 | Animal | Swine  | B1.5    | Leiden-Kuijper | 3.989958 |
| ERS199811                 | Europe | Netherlands | Lierop        | 2011 | Human  | farmer | H170    | Leiden-Kuijper | 3.962313 |
| ERS199812                 | Europe | Netherlands | Ulft          | 2011 | Animal | Swine  | B22.6   | Leiden-Kuijper | 4.04709  |
| ERS199813                 | Europe | Netherlands | Houten        | 2011 | Animal | Swine  | B29.10  | Leiden-Kuijper | 3.837711 |
| ERS199814                 | Europe | Netherlands | Houten        | 2011 | Human  | farmer | H141    | Leiden-Kuijper | 3.83805  |
| <a href="#">ERS199826</a> | Europe | Italy       | Torino        | 2009 | Human  | Human  | IT_0109 | Leiden-Kuijper | 4.069792 |
| <a href="#">ERS199827</a> | Europe | UK          | Leeds         | 2008 | Human  | Human  | 57/33   | Leiden-Kuijper | 3.898584 |

|           |        |             |        |      |       |       |         |                |          |
|-----------|--------|-------------|--------|------|-------|-------|---------|----------------|----------|
| ERS362924 | Europe | Netherlands | Arnhem | 2008 | Human | Human | 8056692 | Leiden-Kuijper | 4.072006 |
|-----------|--------|-------------|--------|------|-------|-------|---------|----------------|----------|
